# Supplementary material for: Therapeutic targets and signaling mechanisms of dasatinib activity against radiation skin ulcer
Source: Front Public Health. 2022 Nov 30;10:1031038. doi: 10.3389/fpubh.2022.1031038 (PMC9749824; doi:10.3389/fpubh.2022.1031038)
Supplement: Supplementary Table 4 — The dasatinib pharmacological targets form Binding DB database. [file Table_4.xlsx]

## Sheet: Sheet1
queryItem	stringId	gene symbol
5-hydroxytryptamine receptor 2A	9606.ENSP00000437737	HTR2A
ABL	9606.ENSP00000361423	ABL1
Activin receptor type-1	9606.ENSP00000263640	ACVR1
Activin receptor type-1B	9606.ENSP00000442656	ACVR1B
Activin receptor type-2A	9606.ENSP00000241416	ACVR2A
Activin receptor type-2B	9606.ENSP00000340361	ACVR2B
Bcr-Abl	9606.ENSP00000361423	ABL1
Cytoplasmic tyrosine-protein kinase BMX	9606.ENSP00000350224	BMX
Discoidin domain-containing receptor 2	9606.ENSP00000356899	DDR2
Dual specificity mitogen-activated protein kinase kinase 1	9606.ENSP00000302486	MAP2K1
Dual specificity mitogen-activated protein kinase kinase 5	9606.ENSP00000178640	MAP2K5
Dual specificity testis-specific protein kinase 1	9606.ENSP00000481045	TESK1
EPHA5	9606.ENSP00000480763	EPHA5
EPHA8	9606.ENSP00000166244	EPHA8
EPHB1	9606.ENSP00000381097	EPHB1
Ephrin receptor	9606.ENSP00000381097	EPHB1
Ephrin type-A receptor 2	9606.ENSP00000351209	EPHA2
Ephrin type-B receptor 2	9606.ENSP00000363763	EPHB2
Ephrin type-B receptor 4	9606.ENSP00000350896	EPHB4
Epidermal growth factor receptor	9606.ENSP00000275493	EGFR
Epithelial discoidin domain-containing receptor 1	9606.ENSP00000427552	DDR1
Fibroblast growth factor receptor 1	9606.ENSP00000393312	FGFR1
LIM domain kinase 1	9606.ENSP00000336740	LIMK1
LIM domain kinase 2	9606.ENSP00000339916	LIMK2
Macrophage colony stimulating factor receptor	9606.ENSP00000394227	CSF2RA
MAP kinase p38	9606.ENSP00000428489	PBK
MAP3K4	9606.ENSP00000375986	MAP3K4
MAP4K1	9606.ENSP00000465039	MAP4K1
MAP4K5	9606.ENSP00000013125	MAP4K5
Mast/stem cell growth factor receptor Kit	9606.ENSP00000288135	KIT
Misshapen-like kinase 1	9606.ENSP00000347427	MINK1
Mitogen-activated protein kinase 11	9606.ENSP00000333685	MAPK11
Mitogen-activated protein kinase 14	9606.ENSP00000229795	MAPK14
Mitogen-activated protein kinase kinase kinase 2	9606.ENSP00000387246	MAP3K2
Mitogen-activated protein kinase kinase kinase 3	9606.ENSP00000354927	MAP3K3
Mitogen-activated protein kinase kinase kinase 4	9606.ENSP00000375986	MAP3K4
Mitogen-activated protein kinase kinase kinase kinase 1	9606.ENSP00000382423	MAP3K1
Mitogen-activated protein kinase kinase kinase kinase 3	9606.ENSP00000263881	MAP4K3
Mitogen-activated protein kinase kinase kinase kinase 5	9606.ENSP00000013125	MAP4K5
Myelin transcription factor 1	9606.ENSP00000327465	MYT1
Myotonin-protein kinase	9606.ENSP00000345997	DMPK
Non-receptor tyrosine-protein kinase TYK2	9606.ENSP00000431885	TYK2
PKMYT1	9606.ENSP00000262300	PKMYT1
Platelet-derived growth factor receptor alpha	9606.ENSP00000257290	PDGFRA
Platelet-derived growth factor receptor beta	9606.ENSP00000261799	PDGFRB
Proto-oncogene tyrosine-protein kinase receptor Ret	9606.ENSP00000347942	RET
Proto-oncogene tyrosine-protein kinase Src	9606.ENSP00000362680	SRC
Receptor tyrosine-protein kinase erbB-2	9606.ENSP00000269571	ERBB2
Receptor tyrosine-protein kinase erbB-3	9606.ENSP00000267101	ERBB3
Receptor-type tyrosine-protein kinase FLT3	9606.ENSP00000241453	FLT3
Serine/threonine-protein kinase 2	9606.ENSP00000233027	NEK4
Serine/threonine-protein kinase 35	9606.ENSP00000370891	STK35
Serine/threonine-protein kinase 36	9606.ENSP00000295709	STK36
Serine/threonine-protein kinase B-raf	9606.ENSP00000288602	BRAF
Serine/threonine-protein kinase Nek11	9606.ENSP00000372857	NEK11
Serine/threonine-protein kinase receptor R3	9606.ENSP00000373574	ACVRL1
Serine/threonine-protein kinase SIK1	9606.ENSP00000270162	SIK1
Serine/threonine-protein kinase SIK3	9606.ENSP00000364449	SIK3
SPS1/STE20-related protein kinase YSK4	9606.ENSP00000365005	MAP3K19
STK36	9606.ENSP00000295709	STK36
TNNI3K	9606.ENSP00000322251	TNNI3K
Tubulin alpha-1 chain	9606.ENSP00000248437	TUBA4A
Tyrosine Kinase EPHA3	9606.ENSP00000245323	EFNB2
Tyrosine kinase non-receptor protein 2	9606.ENSP00000371341	TNK2
Tyrosine- and threonine-specific cdc2-inhibitory kinase	9606.ENSP00000262300	PKMYT1
Tyrosine-protein kinase ABL1	9606.ENSP00000361423	ABL1
Tyrosine-protein kinase ABL2	9606.ENSP00000427562	ABL2
Tyrosine-protein kinase Blk	9606.ENSP00000259089	BLK
Tyrosine-protein kinase BRK	9606.ENSP00000442460	PTK6
Tyrosine-protein kinase BTK	9606.ENSP00000483570	BTK
Tyrosine-protein kinase CSK	9606.ENSP00000220003	CSK
Tyrosine-protein kinase Fgr	9606.ENSP00000363117	FGR
Tyrosine-protein kinase FRK	9606.ENSP00000476145	FRK
Tyrosine-protein kinase Fyn	9606.ENSP00000346671	FYN
Tyrosine-protein kinase HCK	9606.ENSP00000444986	HCK
Tyrosine-protein kinase JAK2	9606.ENSP00000371067	JAK2
Tyrosine-protein kinase JAK3	9606.ENSP00000391676	JAK3
Tyrosine-protein kinase Lck	9606.ENSP00000337825	LCK
Tyrosine-protein kinase Lyn	9606.ENSP00000428924	LYN
Tyrosine-protein kinase Srms	9606.ENSP00000217188	SRMS
Tyrosine-protein kinase TEC	9606.ENSP00000370912	TEC
Tyrosine-protein kinase TXK	9606.ENSP00000264316	TXK
Tyrosine-protein kinase Yes	9606.ENSP00000462468	YES1
Wee1-like protein kinase 2	9606.ENSP00000380675	WEE2
ZAK	9606.ENSP00000364361	ZAK
